# Supplementary material for: Increased sensitivity to salt stress in tocopherol-deficient Arabidopsis mutants growing in a hydroponic system
Source: PubMed Central journal article supplement — Plant Signal Behav. 2013 Jan 8;8(2):e23136. doi: 10.4161/psb.23136 (PMC3657010; doi:10.4161/psb.23136), 2013-01-08

## **Supplemental Material to:**

**Hasna Ellouzi, Karim Ben Hamed, Jana Cela, Maren Müller,  
Chedly Abdelly and Sergi Munné-Bosch**

**Increased sensitivity to salt stress in tocopherol-deficient  
Arabidopsis mutants growing in a hydroponic system**

**Plant Signaling & Behavior 2012; 8(2): e23136**

**<http://dx.doi.org/10.4161/psb.23136>**

**<http://www.landesbioscience.com/journals/psb/article/23136>**

**Supplementary Figure S1** DAB H<sub>2</sub>O<sub>2</sub> staining of leaves of wild type and *vte1* and *vte4* mutants of *A. thaliana* growing in a hydroponic system after 0, 4, 16, 24 or 72h of control and salt treatment.

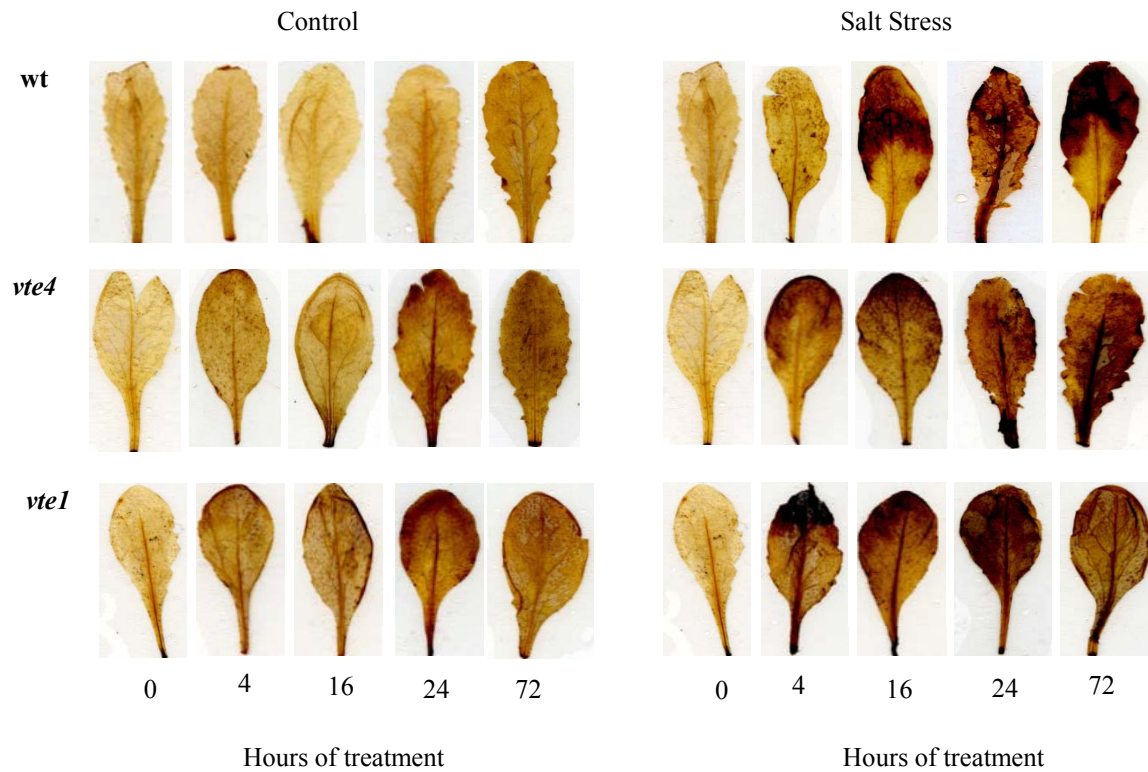

**Supplementary Figure S2** DAB H<sub>2</sub>O<sub>2</sub> staining of roots of wild type and *vte1* and *vte4* mutants of *A. thaliana* growing in a hydroponic system after 0, 4, 16, 24 or 72h of control and salt treatment.

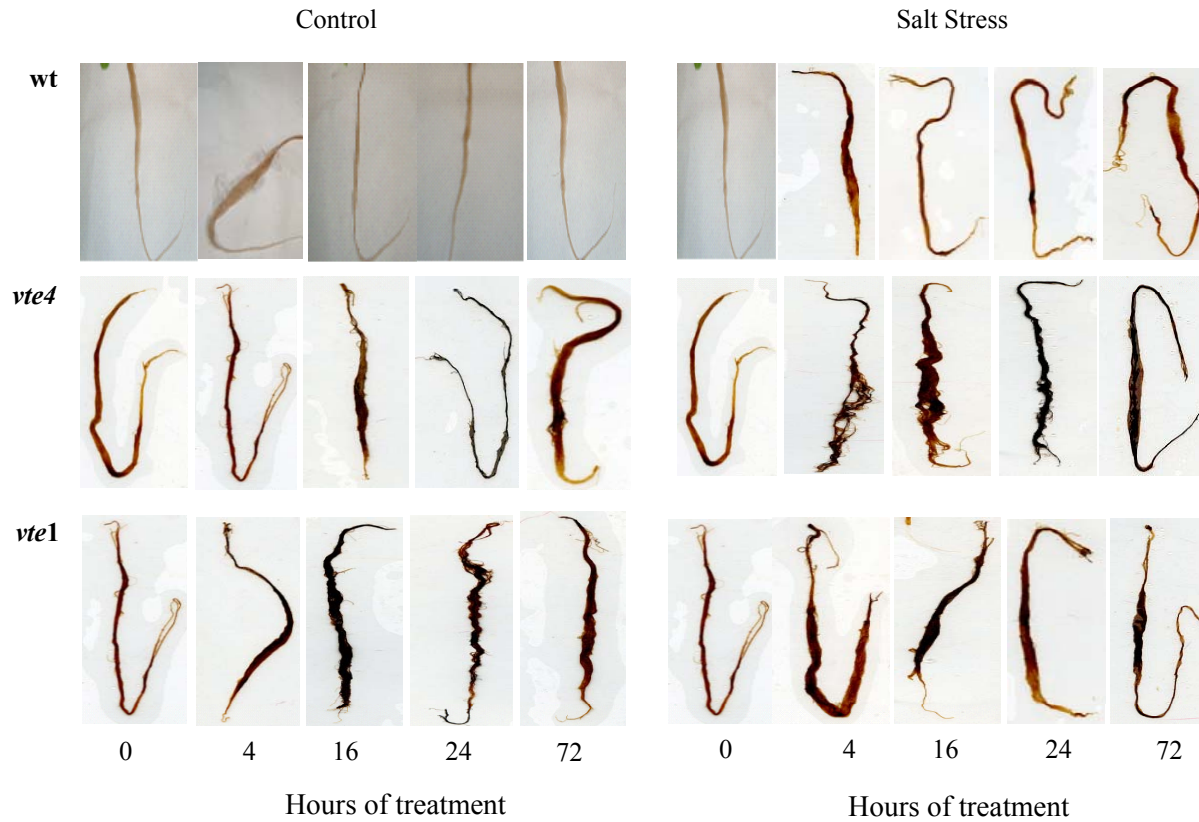

Supplement: psb-8-e23136-s01.pdf [file psb-8-e23136-s01.pdf]
